# Supplementary material for: Plasma metabonomic analysis reveals the effects of salvianic acid on alleviating acute alcoholic liver damage
Source: Royal Society of Chemistry journal article supplement (doi:10.1039/c5ra00823a), 2015-01-01

**Supplementary tables and figures:**

**Table S1.** <sup>1</sup>H NMR data and assignments of the metabolites in rat plasma.

**Table S2.** Significant changes in plasma metabolites at 6 h.

**Table S3.** Significant changes in plasma metabolites at 24 h.

**Figure S1.** Prediction tests for the models in Fig. 3.

**Figure S2.** Permutation test plots (200 permutations) for plasma at 6 h.

**Figure S3.** Permutation test plots (200 permutations) for plasma at 24 h.

**Table S1.** <sup>1</sup>H NMR data and assignments of the metabolites in rat plasma.

| key | metabolites           | $\delta^1\text{H}$ (ppm) <sup>a</sup> and multiplicity |
|-----|-----------------------|--------------------------------------------------------|
| 1   | lipids                | 0.89(m), 1.27(m)                                       |
| 2   | isoleucine            | 0.94(t), 1.02(d)                                       |
| 3   | leucine               | 0.95(d), 0.97(d)                                       |
| 4   | valine                | 0.98(d), 1.04(d)                                       |
| 5   | lactate               | 1.33(d), 4.11(q)                                       |
| 6   | alanine               | 1.48(d)                                                |
| 7   | acetate               | 1.92(s)                                                |
| 8   | N-acetyl glycoprotein | 2.04(s)                                                |
| 9   | O-acetyl glycoprotein | 2.14(s)                                                |
| 10  | acetone               | 2.23(s)                                                |
| 11  | acetoacetate          | 2.28(s)                                                |
| 12  | pyruvate              | 2.38(s)                                                |
| 13  | glutamine             | 2.44(m), 3.77(m), 2.15(m)                              |
| 14  | creatine              | 3.04(s), 3.93(s)                                       |
| 15  | choline               | 3.19(s)                                                |
| 16  | PC                    | 3.23(s)                                                |
| 17  | GPC                   | 3.23(s)                                                |
| 18  | taurine               | 3.25(t), 3.41(t)                                       |
| 19  | TMAO                  | 3.27(s)                                                |
| 20  | betaine               | 3.27(s)                                                |
| 21  | glycine               | 3.54(s)                                                |
| 22  | glycerol              | 3.56(dd), 3.67(dd), 3.87(m)                            |
| 23  | $\alpha$ -glucose     | 5.24(d)                                                |
| 24  | $\beta$ -glucose      | 4.65(d)                                                |
| 25  | unsaturated lipid     | 5.32(s)                                                |
| 26  | tyrosine              | 6.88(d), 7.18(d)                                       |
| 27  | 1-methylhistidine     | 7.05(s), 7.75(s)                                       |
| 28  | Phenylalanine         | 7.34(m), 7.38(m), 7.44(m)                              |
| 29  | formate               | 8.45(s)                                                |

<sup>a</sup> Key: s, singlet; d, doublet; t, triplet; q, quartet; m, multiplet; dd, doublet of doublet.

**Table S2.** Significant changes in plasma metabolites at 6 h.

| key | Plasma metabolites | 6 h Correlation coefficients ( $r^a$ )         |                                           |                                             |
|-----|--------------------|------------------------------------------------|-------------------------------------------|---------------------------------------------|
|     |                    | model vs. control<br>$R^2X=0.61$<br>$Q^2=0.89$ | SA vs. model<br>$R^2X=0.54$<br>$Q^2=0.61$ | SA vs. control<br>$R^2X=0.47$<br>$Q^2=0.51$ |
| 1   | lactate            | 0.78                                           | -0.73                                     | 0.64                                        |
| 2   | alanine            | 0.71                                           | -                                         | 0.63                                        |
| 3   | acetone            | 0.73                                           | -0.74                                     | -                                           |
| 4   | acetoacetate       | 0.66                                           | -                                         | 0.64                                        |
| 5   | acetate            | 0.72                                           | -0.73                                     | -                                           |
| 6   | creatine           | 0.69                                           | -0.64                                     | -                                           |
| 7   | TMAO, betaine      | -0.63                                          | 0.63                                      | -                                           |
| 8   | glycine            | -0.65                                          | 0.64                                      | -                                           |
| 9   | glycerol           | 0.67                                           | -                                         | 0.65                                        |

<sup>a</sup> Correlation coefficients, positive and negative signs indicate positive and negative correlation in the concentrations, respectively.  $P= 0.05$ ,  $[r] = 0.63$  was used as the corresponding cutoff value of correlation coefficient for the statistical significance based on the discrimination significance, respectively. “-” means the correlation coefficient  $[r]$  is less than the cutoff value.

**Table S3.** Significant changes in plasma metabolites at 24 h.

| key | Plasma metabolites | 24 h Correlation coefficients ( $r^a$ )        |                                           |                                             |
|-----|--------------------|------------------------------------------------|-------------------------------------------|---------------------------------------------|
|     |                    | model vs. control<br>$R^2X=0.56$<br>$Q^2=0.89$ | SA vs. model<br>$R^2X=0.65$<br>$Q^2=0.83$ | SA vs. control<br>$R^2X=0.62$<br>$Q^2=0.75$ |
| 1   | lactate            | 0.64                                           | -0.66                                     | -                                           |
| 2   | TMAO, betaine      | -0.64                                          | 0.64                                      | -                                           |
| 3   | glycine            | -0.63                                          | 0.63                                      | -                                           |
| 4   | glycerol           | 0.72                                           | -0.72                                     | -                                           |

<sup>a</sup> Correlation coefficients, positive and negative signs indicate positive and negative correlation in the concentrations, respectively.  $P= 0.05$ ,  $[r] = 0.63$  was used as the corresponding cutoff value of correlation coefficient for the statistical significance based on the discrimination significance, respectively. “-” means the correlation coefficient  $[r]$  is less than the cutoff value.

Figure S1. Prediction tests for the models in Fig. 3.

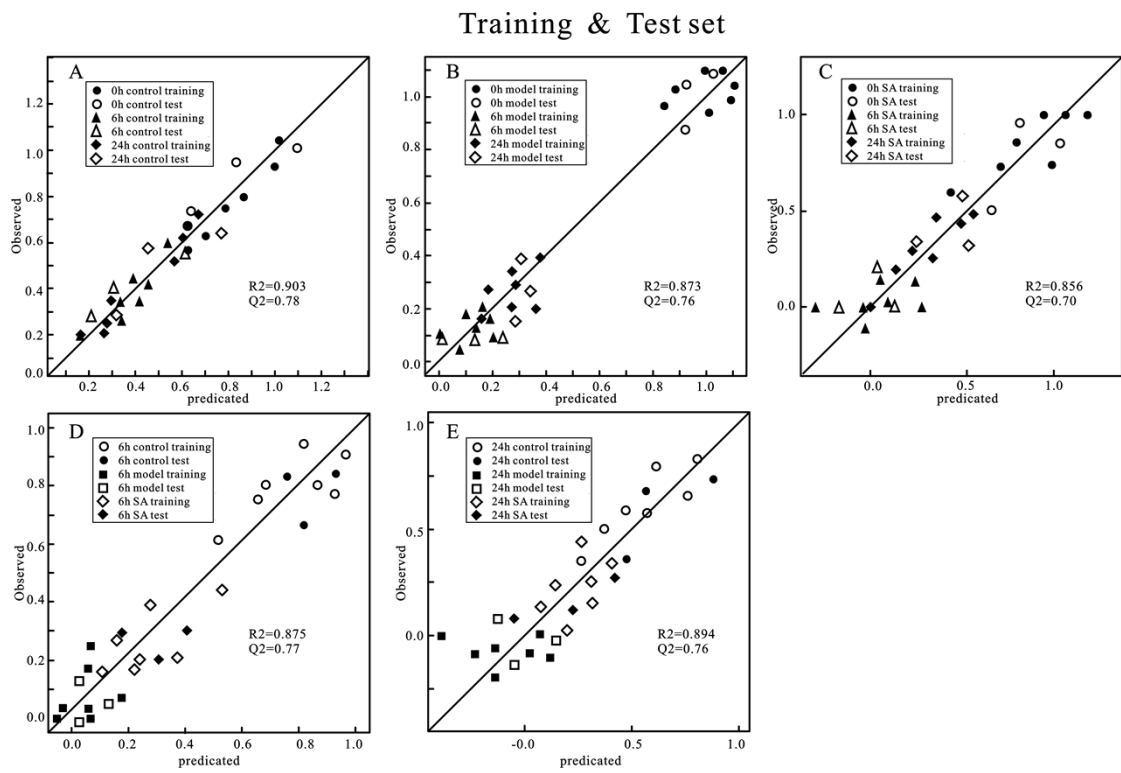

**Figure S2.** Permutation test plots (200 permutations) for plasma at 6 h. a1: model vs control, a2: SA vs model, a3: SA vs control.

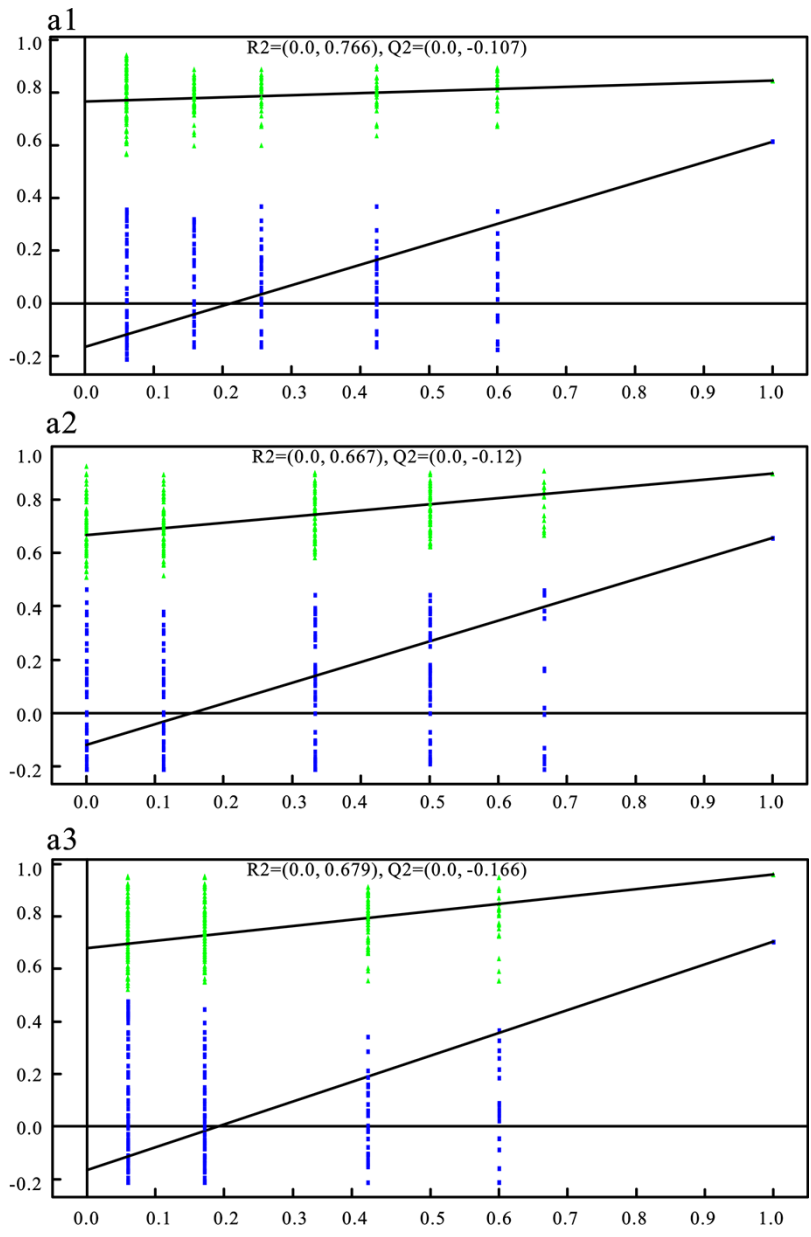

**Figure S3.** Permutation test plots (200 permutations) for plasma at 24 h. a1: model vs control, a2: SA vs model, a3: SA vs control.

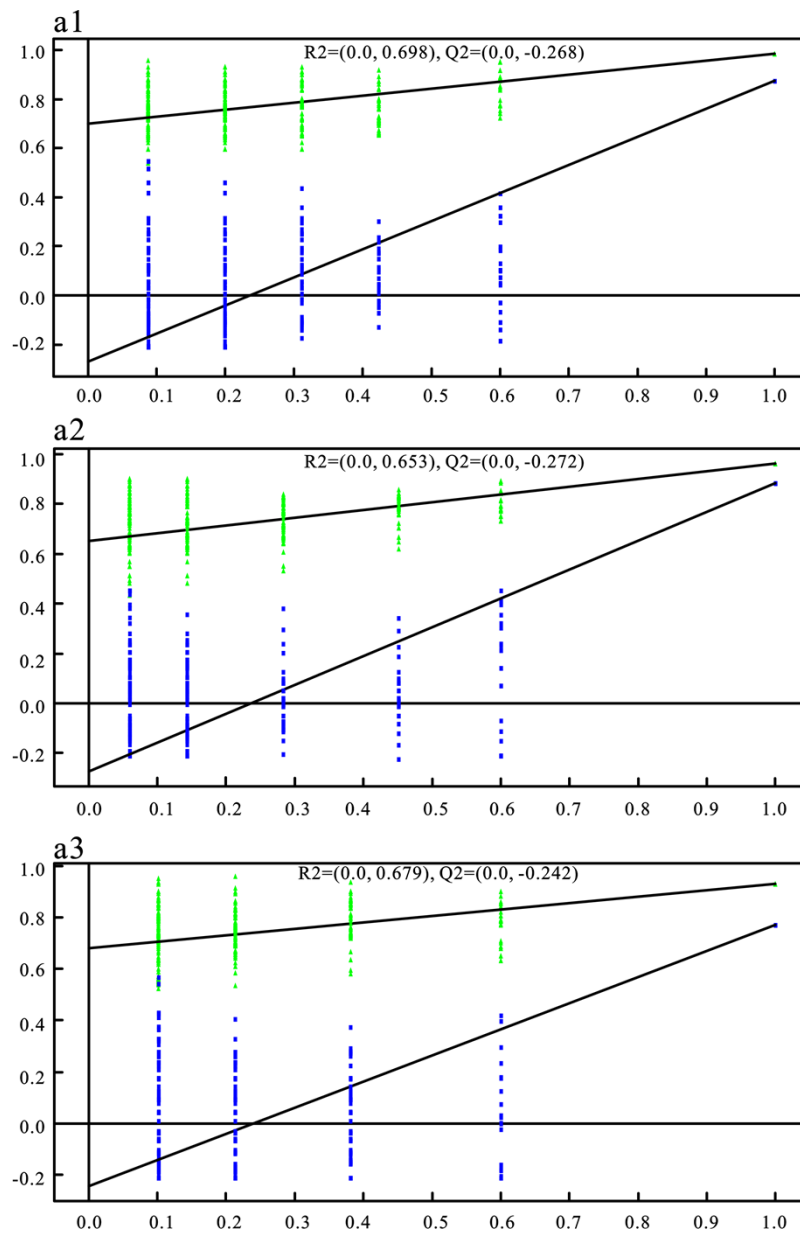

Supplement: c5ra00823a1.pdf [file c5ra00823a1.pdf]
